# Supplementary material for: Whole-exome sequencing reveals genetic variants in ERC1 and KCNG4 associated with complete hydatidiform mole in Chinese Han women
Source: PubMed Central journal article supplement (PMC5650418; doi:10.18632/oncotarget.20769), 2017-09-08
Supplement: oncotarget-08-75264-s001.pdf [file oncotarget-08-75264-s001.pdf]

## Whole-exome sequencing reveals genetic variants in **ERC1** and **KCNG4** associated with complete hydatidiform mole in Chinese Han women

### SUPPLEMENTARY MATERIALS

**Supplementary Table 1: The primers for PCR amplification of candidate SNPs**

| Sites |                   | Sequence |                           |
|-------|-------------------|----------|---------------------------|
| ERC1  | c.G48C(p.Q16H)    | up       | AGATACTTCTTCAAGATTGGACAGC |
|       |                   | down     | GCAGTCATCCGAACACCGTAAGG   |
| KCNG4 | c.G1114A(p.G372S) | up       | AGGTAGGAGTGGGAGAAGGTGT    |
|       |                   | down     | TCGCTGGCGGTGTCTGAGGAG     |

The PCR condition: annealing temperature is 50°C and amplification with 25 cycles.

**Supplementary Table 2: Summary of the exome sequencing data for 98 samples**

See Supplementary File 1

**Supplementary Table 3: List of potentially significant SNVs between CHM patients and healthy controls**

See Supplementary File 2

**Supplementary Table 4: The distribution of SNVs identified using MassARRAY technology**

See Supplementary File 3

**Supplementary Table 5: Possible genes that influence the risk of CHM**

See Supplementary File 4

**Supplementary Table 6: Comparison between WES, mass spectrometry, and Sanger sequencing**

See Supplementary File 5
